# Supplementary material
Source: ML conference proceedings conference paper supplement (https://openaccess.thecvf.com/content/CVPR_2019/html/Dognin_Adversarial_Semantic_Alignment_CVPR_2019_paper.html)
Supplement: Supplementary file 1 [file Dognin_Adversarial_Semantic_Alignment_CVPR_2019_supplemental.pdf]

# Adversarial Semantic Alignment for Improved Image Captions (Supplementary Material)

Pierre Dognin, Igor Melnyk, Youssef Mroueh, Jerret Ross & Tom Sercu  
IBM Research, Yorktown Heights, NY

## A. Semantic Score

Semantic scores was first introduced into the context of image retrieval where it achieves state of the art performance [18]. Some examples of the properties of semantic scores are given in Table 4.

| COCO validation image                                                              | Set   | Semantic Score | Captions                                                         |
|------------------------------------------------------------------------------------|-------|----------------|------------------------------------------------------------------|
|  | Set A | 0.181052       | female tennis player reaches back to swing at the ball           |
|                                                                                    |       | 0.210224       | a woman on a court swinging a racket at a ball                   |
|                                                                                    |       | 0.181592       | a woman in a gray top is playing tennis                          |
|                                                                                    |       | 0.251200       | the woman is playing tennis on the court                         |
|                                                                                    |       | 0.145646       | a woman prepares to hit a tennis ball with a racket              |
|                                                                                    | Set B | 0.008990       | a clear refrigerator is stocked up with food                     |
|                                                                                    |       | 0.005519       | a store freezer is shown with food inside                        |
|                                                                                    |       | -0.014052      | a refrigerated display case is full of dairy groceries           |
|                                                                                    |       | 0.011076       | a close up of a commercial refrigerator with food                |
|                                                                                    |       | -0.029001      | a large cooler with glass doors containing mostly dairy products |
|                                                                                    | Set C | 0.054441       | a giraffe reaches back to swing at the ball                      |
|                                                                                    |       | 0.123822       | female tennis player reaches back to swing at the <b>boat</b>    |
|                                                                                    |       | 0.152860       | <b>male</b> tennis player reaches back to swing at the ball      |
|                                                                                    |       | 0.067289       | female <b>football</b> player reaches back to swing at the ball  |
|                                                                                    | Set D | 0.152860       | <b>male</b> tennis player reaches back to swing at the ball      |
|                                                                                    |       | 0.164755       | female tennis <b>fan</b> reaches back to swing at the ball       |
|                                                                                    |       | 0.152524       | female tennis player <b>looks</b> back to swing at the ball      |
|                                                                                    |       | 0.100098       | female <b>flute</b> player reaches back to swing at the ball     |
|                                                                                    | Set E | 0.114010       | female tennis player swing ball                                  |
|                                                                                    |       | 0.031566       | female player swing ball                                         |
|                                                                                    |       | 0.084016       | tennis player swing ball                                         |
|                                                                                    |       | 0.115490       | tennis player ball                                               |
|                                                                                    |       | 0.092226       | tennis player                                                    |
|                                                                                    |       | -0.044019      | tennis                                                           |
|                                                                                    |       | -0.001948      | ball ball ball ball                                              |

Table 4: Semantic scores for various captions given an image from COCO validation set. Set A is composed of the 5 ground truth captions provided by COCO. Semantic scores are in between .14 and .25 for a possible range of [-1,1] being a cosine distance. Set B is made of captions from another randomly selected image in the validation set. The scores are clearly much worse (smaller) when captions do not match the image visual cues. Set C is a one-word modification set of the first caption in Set A. Semantic scores are all lower compared to the original caption. In Set C, we want to see if the metric is solely sensitive to the main visual cues and if it can pick up subtle differences like gender. Again, all the scores are still lower, even if closer to the original caption’s score. In Set E, we are trying to break the metric by narrowing down to only factual words and objects. The combined knowledge of visual and text correlation penalize simplistic descriptive list of words. This does not imply that the metric cannot be fooled, but it seems resilient to obvious gaming like repeating words of some visual cues.

## B. Experimental Results: Complete Tables

We report here CIDEr, BLEU4, ROUGEL, METEOR, semantic scores, and vocabulary coverage for all models mentioned in this work, both COCO and OOC sets. Table 5 presents all GAN results as average ( $\pm$  standard deviation) over 4 models with different random seeds. Table 6 presents all our ensemble results.

Table 5: Collection of results for all models mentioned in this work. We provide commonly used CIDEr, BLEU4, ROUGEL, METEOR scores, as well as semantic scores, and percentage of vocabulary coverage for both COCO and OOC. Results are averaged from 4 models from independent trainings. We report mean and standard deviation for all metrics when available.

|                                                                         | COCO Test Set        |           |              |             |              |             |              |             |                |             |                     |           |
|-------------------------------------------------------------------------|----------------------|-----------|--------------|-------------|--------------|-------------|--------------|-------------|----------------|-------------|---------------------|-----------|
|                                                                         | CIDEr                |           | BLEU4        |             | ROUGEL       |             | METEOR       |             | Semantic Score |             | Vocabulary Coverage |           |
| CE                                                                      | 101.6                | $\pm 0.4$ | 0.312        | $\pm 0.001$ | 0.542        | $\pm 0.001$ | 0.260        | $\pm 0.001$ | 0.186          | $\pm 0.001$ | 9.2                 | $\pm 0.1$ |
| CIDEr-RL                                                                | <b>116.1</b>         | $\pm 0.2$ | <b>0.350</b> | $\pm 0.003$ | <b>0.562</b> | $\pm 0.001$ | 0.269        | $\pm 0.000$ | 0.184          | $\pm 0.001$ | 5.1                 | $\pm 0.1$ |
| GAN <sub>1</sub> (SCST, Co-att, $\log(D)$ )                             | 97.5                 | $\pm 0.8$ | 0.294        | $\pm 0.002$ | 0.532        | $\pm 0.001$ | 0.256        | $\pm 0.001$ | 0.190          | $\pm 0.000$ | 11.0                | $\pm 0.1$ |
| GAN <sub>2</sub> (SCST, Co-att, $\log(D) + 5 \times \text{CIDEr}$ )     | 111.1                | $\pm 0.7$ | 0.330        | $\pm 0.004$ | 0.555        | $\pm 0.002$ | <b>0.271</b> | $\pm 0.002$ | <b>0.192</b>   | $\pm 0.000$ | 7.3                 | $\pm 0.2$ |
| GAN <sub>3</sub> (SCST, Joint-Emb, $\log(D)$ )                          | 97.1                 | $\pm 1.2$ | 0.287        | $\pm 0.005$ | 0.530        | $\pm 0.002$ | 0.256        | $\pm 0.002$ | 0.188          | $\pm 0.000$ | <b>11.2</b>         | $\pm 0.1$ |
| GAN <sub>4</sub> (SCST, Joint-Emb, $\log(D) + 5 \times \text{CIDEr}$ )  | 108.2                | $\pm 4.9$ | 0.325        | $\pm 0.017$ | 0.551        | $\pm 0.008$ | 0.267        | $\pm 0.004$ | 0.190          | $\pm 0.000$ | 8.3                 | $\pm 1.6$ |
| GAN <sub>5</sub> (Gumbel Soft, Co-att, $\log(D)$ )                      | 93.6                 | $\pm 3.3$ | 0.282        | $\pm 0.015$ | 0.524        | $\pm 0.007$ | 0.253        | $\pm 0.007$ | 0.187          | $\pm 0.002$ | 11.1                | $\pm 1.2$ |
| GAN <sub>6</sub> (Gumbel ST, Co-att, $\log(D)$ )                        | 95.4                 | $\pm 1.5$ | 0.298        | $\pm 0.009$ | 0.531        | $\pm 0.005$ | 0.249        | $\pm 0.004$ | 0.184          | $\pm 0.003$ | 10.1                | $\pm 0.9$ |
| GAN <sub>7</sub> (Gumbel ST, Co-att, $\log(D) + \text{FM}$ )            | 92.1                 | $\pm 5.4$ | 0.289        | $\pm 0.020$ | 0.523        | $\pm 0.015$ | 0.243        | $\pm 0.011$ | 0.175          | $\pm 0.006$ | 8.6                 | $\pm 0.8$ |
| G-GAN [4] from Table 1                                                  | 79.5                 |           | 0.207        |             | 0.475        |             | 0.224        |             | –              |             | –                   |           |
| CE* – * for non-attentional models                                      | 87.6                 | $\pm 1.2$ | 0.275        | $\pm 0.003$ | 0.516        | $\pm 0.003$ | 0.242        | $\pm 0.001$ | 0.175          | $\pm 0.002$ | 9.9                 | $\pm 0.8$ |
| CIDEr-RL*                                                               | 100.4                | $\pm 7.9$ | 0.305        | $\pm 0.018$ | 0.536        | $\pm 0.010$ | 0.253        | $\pm 0.006$ | 0.173          | $\pm 0.002$ | 6.8                 | $\pm 1.4$ |
| GAN <sub>1</sub> *(SCST, Co-att, $\log(D)$ )                            | 89.7                 | $\pm 0.9$ | 0.276        | $\pm 0.000$ | 0.518        | $\pm 0.001$ | 0.246        | $\pm 0.001$ | 0.184          | $\pm 0.001$ | 13.2                | $\pm 0.2$ |
| GAN <sub>2</sub> *(SCST, Co-att, $\log(D) + 5 \times \text{CIDEr}$ )    | 103.1                | $\pm 0.5$ | 0.311        | $\pm 0.003$ | 0.542        | $\pm 0.001$ | 0.261        | $\pm 0.001$ | 0.183          | $\pm 0.001$ | 7.1                 | $\pm 0.2$ |
| GAN <sub>3</sub> *(SCST, Joint-Emb, $\log(D)$ )                         | 90.7                 | $\pm 0.1$ | 0.277        | $\pm 0.002$ | 0.520        | $\pm 0.000$ | 0.248        | $\pm 0.001$ | 0.181          | $\pm 0.001$ | 12.9                | $\pm 0.1$ |
| GAN <sub>4</sub> *(SCST, Joint-Emb, $\log(D) + 5 \times \text{CIDEr}$ ) | 102.7                | $\pm 0.4$ | 0.315        | $\pm 0.000$ | 0.542        | $\pm 0.000$ | 0.260        | $\pm 0.001$ | 0.182          | $\pm 0.001$ | 7.7                 | $\pm 0.1$ |
|                                                                         | OOC (Out of Context) |           |              |             |              |             |              |             |                |             |                     |           |
|                                                                         | CIDEr                |           | BLEU4        |             | ROUGEL       |             | METEOR       |             | Semantic Score |             | Vocabulary Coverage |           |
| CE                                                                      | 42.2                 | $\pm 0.6$ | 0.168        | $\pm 0.005$ | 0.413        | $\pm 0.003$ | 0.169        | $\pm 0.001$ | 0.118          | $\pm 0.001$ | 2.8                 | $\pm 0.1$ |
| CIDEr-RL                                                                | 45.0                 | $\pm 0.6$ | 0.177        | $\pm 0.002$ | 0.417        | $\pm 0.004$ | 0.170        | $\pm 0.003$ | 0.117          | $\pm 0.002$ | 2.1                 | $\pm 0.0$ |
| GAN <sub>1</sub> (SCST, Co-att, $\log(D)$ )                             | 41.0                 | $\pm 1.6$ | 0.161        | $\pm 0.013$ | 0.406        | $\pm 0.006$ | 0.168        | $\pm 0.003$ | <b>0.124</b>   | $\pm 0.000$ | 3.2                 | $\pm 0.1$ |
| GAN <sub>2</sub> (SCST, Co-att, $\log(D) + 5 \times \text{CIDEr}$ )     | <b>45.8</b>          | $\pm 0.9$ | 0.179        | $\pm 0.014$ | 0.417        | $\pm 0.005$ | <b>0.173</b> | $\pm 0.001$ | 0.122          | $\pm 0.002$ | 2.8                 | $\pm 0.1$ |
| GAN <sub>3</sub> (SCST, Joint-Emb, $\log(D)$ )                          | 41.8                 | $\pm 1.6$ | 0.162        | $\pm 0.006$ | 0.404        | $\pm 0.006$ | 0.167        | $\pm 0.002$ | 0.122          | $\pm 0.001$ | <b>3.3</b>          | $\pm 0.0$ |
| GAN <sub>4</sub> (SCST, Joint-Emb, $\log(D) + 5 \times \text{CIDEr}$ )  | 45.4                 | $\pm 1.4$ | <b>0.180</b> | $\pm 0.011$ | <b>0.418</b> | $\pm 0.005$ | <b>0.173</b> | $\pm 0.002$ | 0.122          | $\pm 0.003$ | 2.8                 | $\pm 0.2$ |
| GAN <sub>5</sub> (gumbel soft, Co-att, $\log(D)$ )                      | 38.3                 | $\pm 3.7$ | 0.154        | $\pm 0.020$ | 0.406        | $\pm 0.006$ | 0.164        | $\pm 0.006$ | 0.121          | $\pm 0.004$ | <b>3.3</b>          | $\pm 0.3$ |
| GAN <sub>6</sub> (gumbel-ST, Co-att, $\log(D)$ )                        | 38.5                 | $\pm 1.9$ | 0.148        | $\pm 0.005$ | 0.407        | $\pm 0.004$ | 0.161        | $\pm 0.005$ | 0.116          | $\pm 0.004$ | 3.0                 | $\pm 0.2$ |
| GAN <sub>7</sub> (gumbel-ST, Co-att, $\log(D) + \text{FM}$ )            | 36.8                 | $\pm 2.3$ | 0.154        | $\pm 0.012$ | 0.396        | $\pm 0.009$ | 0.157        | $\pm 0.006$ | 0.110          | $\pm 0.005$ | 2.5                 | $\pm 0.2$ |
| CE*                                                                     | 32.0                 | $\pm 0.4$ | 0.132        | $\pm 0.007$ | 0.392        | $\pm 0.002$ | 0.152        | $\pm 0.002$ | 0.103          | $\pm 0.002$ | 2.6                 | $\pm 1$   |
| CIDEr-RL*                                                               | 33.4                 | $\pm 1.4$ | 0.145        | $\pm 0.009$ | 0.394        | $\pm 0.006$ | 0.154        | $\pm 0.003$ | 0.101          | $\pm 0.003$ | 2.1                 | $\pm 2$   |
| GAN <sub>1</sub> *(SCST, Co-att, $\log(D)$ )                            | 30.8                 | $\pm 1.0$ | 0.127        | $\pm 0.001$ | 0.383        | $\pm 0.006$ | 0.155        | $\pm 0.003$ | 0.111          | $\pm 0.001$ | 3.4                 | $\pm 0.1$ |
| GAN <sub>2</sub> *(SCST, Co-att, $\log(D) + 5 \times \text{CIDEr}$ )    | 33.7                 | $\pm 1.9$ | 0.145        | $\pm 0.011$ | 0.391        | $\pm 0.004$ | 0.157        | $\pm 0.001$ | 0.108          | $\pm 0.001$ | 2.7                 | $\pm 0.1$ |
| GAN <sub>3</sub> *(SCST, Joint-Emb, $\log(D)$ )                         | 30.8                 | $\pm 2.1$ | 0.126        | $\pm 0.009$ | 0.380        | $\pm 0.004$ | 0.153        | $\pm 0.002$ | 0.108          | $\pm 0.001$ | 3.5                 | $\pm 0.1$ |
| GAN <sub>4</sub> *(SCST, Joint-Emb, $\log(D) + 5 \times \text{CIDEr}$ ) | 33.3                 | $\pm 2.4$ | 0.144        | $\pm 0.016$ | 0.391        | $\pm 0.006$ | 0.157        | $\pm 0.004$ | 0.106          | $\pm 0.000$ | 2.7                 | $\pm 0.1$ |

## C. Semantic and Discriminator Scores Correlation over Training Epochs

We are interested in the correlation between the semantic scores and discriminator scores of image captions as well as its evolution along the process of SCST GAN training. We provide scatter plots for the Joint-Embedding discriminator [4] across training in Figure 9. This GAN model was trained over 40 epochs with a discriminator pretrained on 15 epochs of data.

We compare semantic scores and discriminator scores over training epochs given the ground truth (GT) caption for each image in the COCO Test set (5K images). Each GT caption being fixed, we can observe the evolution of the semantic and discriminator score without any other effects. Figure 9 show the semantic score, discriminator score pairs for each image (one

Table 6: Collection of ensembling results for GAN models from Table 2. We provide commonly used CIDEr, BLEU4, ROUGEL, METEOR scores, as well as semantic scores, and percentage of vocabulary coverage for both COCO and OOC.

|                               |                                                                              | COCO Test Set        |              |              |              |                |                     |
|-------------------------------|------------------------------------------------------------------------------|----------------------|--------------|--------------|--------------|----------------|---------------------|
|                               |                                                                              | CIDEr                | BLEU4        | ROUGEL       | METEOR       | Semantic Score | Vocabulary Coverage |
| (CE and RL Baselines)         | Ens <sub>CE</sub> (CE)                                                       | 105.8                | 0.327        | 0.553        | 0.266        | 0.189          | 8.4                 |
|                               | Ens <sub>RL</sub> (CIDEr-RL)                                                 | <b>118.9</b>         | <b>0.359</b> | <b>0.568</b> | 0.273        | 0.186          | 5.0                 |
| (SCST, Co-att, *)             | Ens <sub>1</sub> (GAN <sub>1</sub> )                                         | 102.6                | 0.314        | 0.543        | 0.262        | <b>0.195</b>   | 9.9                 |
|                               | Ens <sub>2</sub> (GAN <sub>2</sub> )                                         | 115.1                | 0.347        | 0.566        | <b>0.277</b> | 0.194          | 7.0                 |
|                               | Ens <sub>12</sub> (GAN <sub>1</sub> , GAN <sub>2</sub> )                     | 113.2                | 0.344        | 0.564        | 0.274        | <b>0.195</b>   | 7.3                 |
| (SCST, Joint-Emb, *)          | Ens <sub>3</sub> (GAN <sub>3</sub> )                                         | 109.8                | 0.331        | 0.556        | 0.270        | 0.193          | 8.5                 |
|                               | Ens <sub>4</sub> (GAN <sub>4</sub> )                                         | 113.0                | 0.343        | 0.562        | 0.274        | 0.193          | 7.6                 |
|                               | Ens <sub>34</sub> (GAN <sub>3</sub> , GAN <sub>4</sub> )                     | 111.1                | 0.335        | 0.558        | 0.271        | 0.193          | 8.1                 |
| (Gumbel *, Co-att, *)         | Ens <sub>5</sub> (GAN <sub>5</sub> )                                         | 100.1                | 0.307        | 0.538        | 0.259        | 0.191          | <b>10.0</b>         |
|                               | Ens <sub>6</sub> (GAN <sub>6</sub> )                                         | 99.6                 | 0.313        | 0.541        | 0.253        | 0.187          | 9.3                 |
|                               | Ens <sub>7</sub> (GAN <sub>7</sub> )                                         | 100.2                | 0.321        | 0.543        | 0.254        | 0.180          | 7.8                 |
|                               | Ens <sub>567</sub> (GAN <sub>5</sub> , GAN <sub>6</sub> , GAN <sub>7</sub> ) | 103.2                | 0.327        | 0.550        | 0.258        | 0.188          | 8.7                 |
| (SCST+Gumbel Soft, Co-att, *) | Ens <sub>125</sub> (GAN <sub>1</sub> , GAN <sub>2</sub> , GAN <sub>5</sub> ) | 112.4                | 0.343        | 0.562        | 0.273        | <b>0.195</b>   | 7.7                 |
|                               |                                                                              | OOC (Out of Context) |              |              |              |                |                     |
|                               |                                                                              | CIDEr                | BLEU4        | ROUGEL       | METEOR       | Semantic Score | Vocabulary Coverage |
| (CE and RL Baselines)         | Ens <sub>CE</sub> (CE)                                                       | 44.8                 | 0.177        | 0.423        | 0.172        | 0.122          | 2.6                 |
|                               | Ens <sub>RL</sub> (RL)                                                       | 48.8                 | <b>0.198</b> | 0.427        | 0.175        | 0.122          | 2.1                 |
| (SCST, Co-att, *)             | Ens <sub>1</sub> (GAN <sub>1</sub> )                                         | 44.8                 | 0.175        | 0.422        | 0.172        | <b>0.129</b>   | <b>3.0</b>          |
|                               | Ens <sub>2</sub> (GAN <sub>2</sub> )                                         | 48.3                 | 0.189        | 0.429        | 0.176        | 0.127          | 2.7                 |
|                               | Ens <sub>12</sub> (GAN <sub>1</sub> +4×GAN <sub>2</sub> )                    | 49.9                 | 0.197        | <b>0.437</b> | 0.178        | <b>0.129</b>   | 2.6                 |
| (SCST, Joint-Emb, *)          | Ens <sub>3</sub> (GAN <sub>3</sub> )                                         | 48.5                 | <b>0.198</b> | 0.429        | 0.175        | 0.127          | 2.8                 |
|                               | Ens <sub>4</sub> (GAN <sub>4</sub> )                                         | 48.0                 | 0.185        | 0.432        | 0.178        | 0.127          | 2.7                 |
|                               | Ens <sub>34</sub> (GAN <sub>3</sub> +4×GAN <sub>4</sub> )                    | <b>50.1</b>          | 0.195        | 0.435        | 0.177        | 0.127          | 2.8                 |
| (Gumbel *, Co-att, *)         | Ens <sub>5</sub> (GAN <sub>5</sub> )                                         | 43.1                 | 0.169        | 0.420        | 0.170        | 0.127          | <b>3.0</b>          |
|                               | Ens <sub>6</sub> (GAN <sub>6</sub> )                                         | 41.0                 | 0.155        | 0.420        | 0.165        | 0.122          | 2.8                 |
|                               | Ens <sub>7</sub> (GAN <sub>7</sub> )                                         | 38.9                 | 0.166        | 0.413        | 0.164        | 0.113          | 2.3                 |
|                               | Ens <sub>567</sub> (GAN <sub>5</sub> , GAN <sub>6</sub> , GAN <sub>7</sub> ) | 41.8                 | 0.167        | 0.418        | 0.164        | 0.121          | 2.7                 |
| (SCST+Gumbel Soft, Co-att, *) | Ens <sub>125</sub> (GAN <sub>1</sub> , GAN <sub>2</sub> , GAN <sub>5</sub> ) | 49.8                 | <b>0.198</b> | 0.436        | <b>0.179</b> | <b>0.129</b>   | 2.7                 |

point per image) for the joint embedding discriminator. Since the GT captions are fixed, the semantic scores will be identical across epochs. From the first epoch, the joint embedding discriminator provides a wide range of scores with most scores close to the 0.0 and 1.0 min/max values. Quickly the points cluster into a 'sail' like shape in the lower right corner, away from the min/max edges. The color assigned to each point is directly linked to the semantic scores assigned at the first epoch of training. You can therefore have a small visual cue of the movement of these points from epoch to epoch and witness the discriminator learning how to distinguish real and fake captions.

## D. Human Evaluation

In this section we present the details of our evaluation protocol for our captioning models on Amazon MTurk. All images are presented to 5 workers and aggregated in mean opinion score (MOS) or majority vote.

**Turing Test.** In this setting we give human evaluators an image with a sentence either generated from our GAN captioning models or the ground truth. We ask them whether the sentence is human generated or machine generated. Exact instructions are: "Is this image caption written by a human? Yes/No. The caption could be written by a human or by a computer, more or less 50-50 chance."

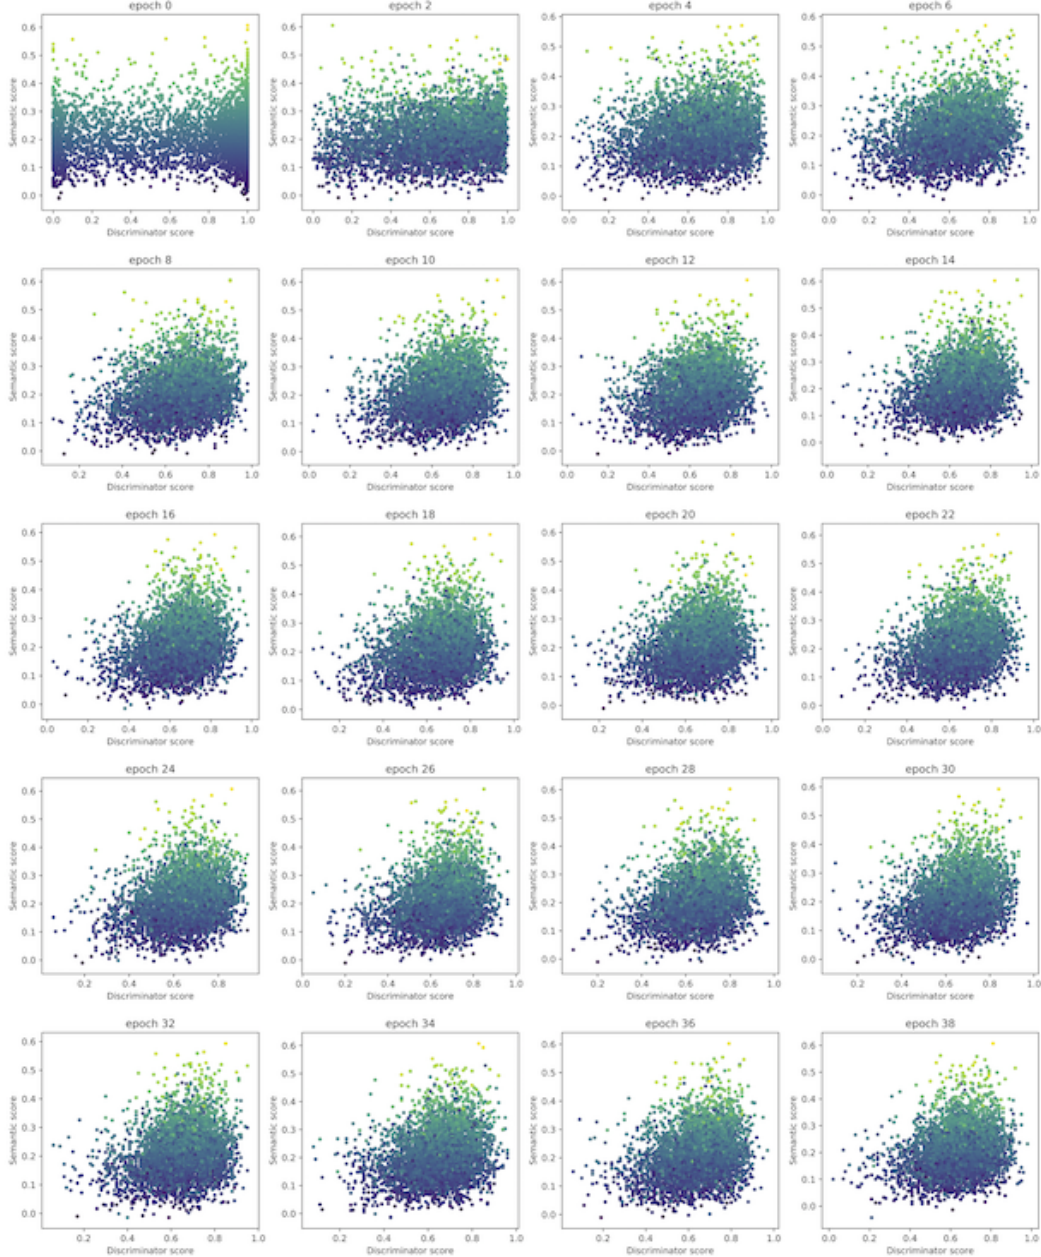

Figure 9: Semantic vs. Discriminator scores across 40 training epochs for ground truth captions using the joint embedding discriminator [4].

**Fine Grained Evaluation and Model Comparison.** In this experiment we give human evaluators an image and a set of 3 captions: Generated by CE trained model, SCST CIDEr trained model, and a GAN model. We ask them to rate each sentence on a scale of one to five. After rating, the worker chooses the caption he/she thinks is best at describing the image. In Section 4, we provide results for Mean Opinion Score and Majority vote based of this interface (see Figure 10) and Table 7.

## E. Experimental Protocol SCST vs. Gumbel

In Figure 11, we show that all our Gumbel Methods trained effectively. We plot the Discriminator scores (averaged over minibatch) during training with the 3 reported Gumbel models. Generated sentences get roughly 0.5, random sentences around 0.1, real sentences around 0.75. Hence, the Discriminator can correctly distinguish real from random, and generated sentences.



Rate the 3 captions' quality (1=garbage, 5=excellent). Then pick the best one. (Click to expand)

  


**A:** a man and a woman are playing tennis on a court

☐ 1
 ☐ 2
 ☐ 3
 ☐ 4
 ☐ 5

---

**B:** a woman and a child are playing tennis on a tennis court

☐ 1
 ☐ 2
 ☐ 3
 ☐ 4
 ☐ 5

---

**C:** a man and a woman playing tennis on a street

☐ 1
 ☐ 2
 ☐ 3
 ☐ 4
 ☐ 5

Best caption: ☐ A ☒ B ☐ C

Submit

Figure 10: The interface of "Fine Grained Evaluation".

Table 7: MOS and semantic scores collected from Amazon MTurk.

|                                                                     | COCO Test      |              | OOC            |       |
|---------------------------------------------------------------------|----------------|--------------|----------------|-------|
|                                                                     | Semantic Score | MOS          | Semantic Score | MOS   |
| Ens <sub>CE</sub> (CE)                                              | 0.189          | 3.222        | 0.122          | 3.065 |
| Ens <sub>RL</sub> (CIDEr-RL)                                        | 0.186          | 3.297        | 0.122          | 3.097 |
| Ens <sub>1</sub> (SCST, Co-att, $\log(D)$ )                         | <b>0.195</b>   | 3.398        | –              | –     |
| Ens <sub>2</sub> (SCST, Co-att, $\log(D) + 5 \times \text{CIDEr}$ ) | 0.194          | <b>3.442</b> | 0.127          | 3.107 |
| Ens <sub>3</sub> (SCST, Joint-Emb, $\log(D)$ )                      | 0.193          | 3.286        | –              | –     |
| Ens <sub>5</sub> (Gumbel Soft, Co-Att, $\log(D)$ )                  | 0.191          | 3.138        | –              | –     |
| Ens <sub>7</sub> (Gumbel ST, Co-Att, $\log(D) + \text{FM}$ )        | 0.180          | 3.235        | –              | –     |

This indicates a healthy training of all Gumbel Methods.

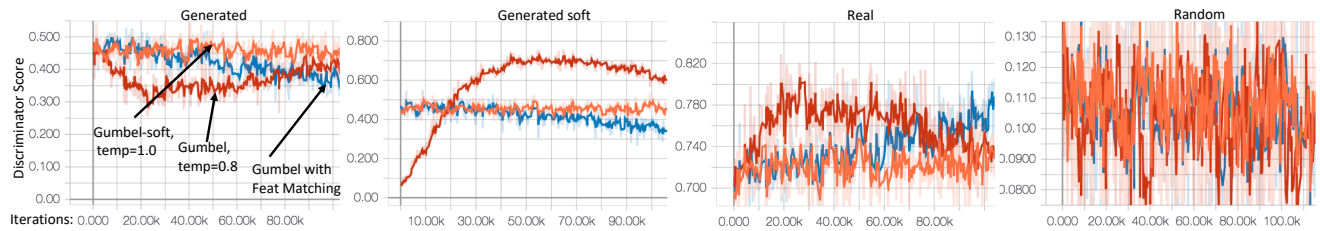

Figure 11: Discriminator scores across different training Gumbel Methods.

## F. Examples of Generated Captions

In this section we present several examples of captions generated from our model. In particular, Figure 12 and Figure 13 show captions for randomly picked images (from COCO and OOC respectively) which provide a good description of the image content. We do the opposite in Figure 14 and Figure 15 where examples of bad captions are provided for COCO and OOC respectively.

|                                                                                                                                                                                                          |                                                                                                                                                                                                                                     |
|----------------------------------------------------------------------------------------------------------------------------------------------------------------------------------------------------------|-------------------------------------------------------------------------------------------------------------------------------------------------------------------------------------------------------------------------------------|
|                                                                                                                         |                                                                                                                                                   |
| <p>GAN: a group of boats are docked in a harbor<br/> CE: a group of boats sitting in the water<br/> RL: a group of boats sitting in the water<br/> GT: some boats parked in the water at a dock</p>      | <p>GAN: a man holding a baseball bat at night<br/> CE: a man is holding a bat in a dark<br/> RL: a man holding a baseball bat at a ball<br/> GT: a boy in yellow shirt swinging a baseball bat</p>                                  |
|                                                                                                                       |                                                                                                                                                 |
| <p>GAN: a dog laying down on a person 's lap<br/> CE: a dog is sleeping on a couch with a person<br/> RL: a dog laying on a couch with a person<br/> GT: a dog that is laying next to another person</p> | <p>GAN: a bunch of umbrellas hanging from a wall in a store<br/> CE: a bunch of umbrellas that are hanging from a wall<br/> RL: a group of umbrellas hanging from a store<br/> GT: a bunch of umbrellas that are behind a glass</p> |

Figure 12: Cherry-picked examples on the COCO validation set.

|                                                                                                                                                                                                                                                     |                                                                                                                                                                                                                                                                 |
|-----------------------------------------------------------------------------------------------------------------------------------------------------------------------------------------------------------------------------------------------------|-----------------------------------------------------------------------------------------------------------------------------------------------------------------------------------------------------------------------------------------------------------------|
|                                                                                                                                                                    |                                                                                                                                                                               |
| <p>GAN: a store front with a car parked in front of it<br/> CE: a store with a sign on the side of it<br/> RL: a building with a sign on the side of it<br/> GT: a car has crashed into the store front of a chinese restaurant</p>                 | <p>GAN: a bed sitting in the middle of a forest<br/> CE: a bed with a green blanket on it<br/> RL: a bed in a forest with a table<br/> GT: a bed lies on top of a clover field in a forest</p>                                                                  |
|                                                                                                                                                                   |                                                                                                                                                                              |
| <p>GAN: a couch sitting in front of a house with a trash can<br/> CE: a white couch sitting in front of a house<br/> RL: a couch sitting in front of a house<br/> GT: a white couch on top of a grass curb with a black table in the background</p> | <p>GAN: a large passenger jet taking off from a busy street<br/> CE: a large passenger jet sitting on top of a runway<br/> RL: a group of cars parked on the runway at an airplane<br/> GT: an airplane descends very close to traffic stuck at a red light</p> |

Figure 13: Cherry-picked examples on the Out of Context (OOC) set.



|                                                                                                                                                                                                                                        |                                                                                                                                                                                                                                  |
|----------------------------------------------------------------------------------------------------------------------------------------------------------------------------------------------------------------------------------------|----------------------------------------------------------------------------------------------------------------------------------------------------------------------------------------------------------------------------------|
|                                                                                                                                                       |                                                                                                                                                |
| <p>GAN: a baseball player swinging a bat at a ball<br/> CE: a baseball player is swinging a bat at a ball<br/> RL: a baseball player swinging a bat at a ball<br/> GT: a man that is standing in the dirt with a glove</p>             | <p>GAN: a black and white photo of two men in suits<br/> CE: a man and a woman standing next to each other<br/> RL: a black and white photo of a man and a woman<br/> GT: a man sitting next to a woman while wearing a suit</p> |
|                                                                                                                                                     |                                                                                                                                              |
| <p>GAN: a woman sitting on a bench looking at her cell phone<br/> CE: a woman sitting on a bench in a park<br/> RL: a woman sitting on the ground next to a bench<br/> GT: a woman is sitting with a suitcase on some train tracks</p> | <p>GAN: a bike that is in a room with a bike<br/> CE: a bicycle with a bicycle and a bicycle in a room<br/> RL: a room with a bed and a table in a room<br/> GT: the hospital bed is metal and has wheels</p>                    |

Figure 14: Lime-picked examples on the COCO test set.

|                                                                                                                                                                                                                                                                                                                             |                                                                                                                                                                                                                                                               |
|-----------------------------------------------------------------------------------------------------------------------------------------------------------------------------------------------------------------------------------------------------------------------------------------------------------------------------|---------------------------------------------------------------------------------------------------------------------------------------------------------------------------------------------------------------------------------------------------------------|
|                                                                                                                                                                                                                                            |                                                                                                                                                                             |
| <p>GAN: a man standing on the side of the road with a skateboard<br/> CE: a man standing on the side of a road with a cell phone<br/> RL: a man standing on the side of a road with a cell phone<br/> GT: a woman holds a drink can while holding the door to a refrigerator that is sitting on the asphalt of a street</p> | <p>GAN: two people walking on a beach with a dog<br/> CE: a couple of people walking on a beach with a dog<br/> RL: a group of people walking on a beach with a dog<br/> GT: a lady is flying a chair as if its a kite while walking along the water edge</p> |
|                                                                                                                                                                                                                                          |                                                                                                                                                                           |
| <p>GAN: a couple of chairs and a blue beach chairs on a beach<br/> CE: a couple of chairs sitting next to each other on a beach<br/> RL: a group of chairs and a table in the beach<br/> GT: a picture of a chair on an empty beach with a laptop on the arm</p>                                                            | <p>GAN: a painting of a vase in front of a fire hydrant<br/> CE: a painting of a fire place in a room<br/> RL: a bedroom with a bed and a clock on the wall<br/> GT: a white goat wearing a gold crown sits on a gold bed</p>                                 |

Figure 15: Lime-picked examples on the Out of Context (OOC) set.
